# Supplementary material for: Effect of the length of anodically grown titania nanotubes on the efficiency of a moisture-stable hole transport material (HTM)-free perovskite solar cell
Source: Royal Society of Chemistry journal article supplement (doi:10.1039/c9ce00533a), 2019-01-01
Supplement: c9ce00533a1.pdf [file c9ce00533a1.pdf]

## Electronic Supplementary Material

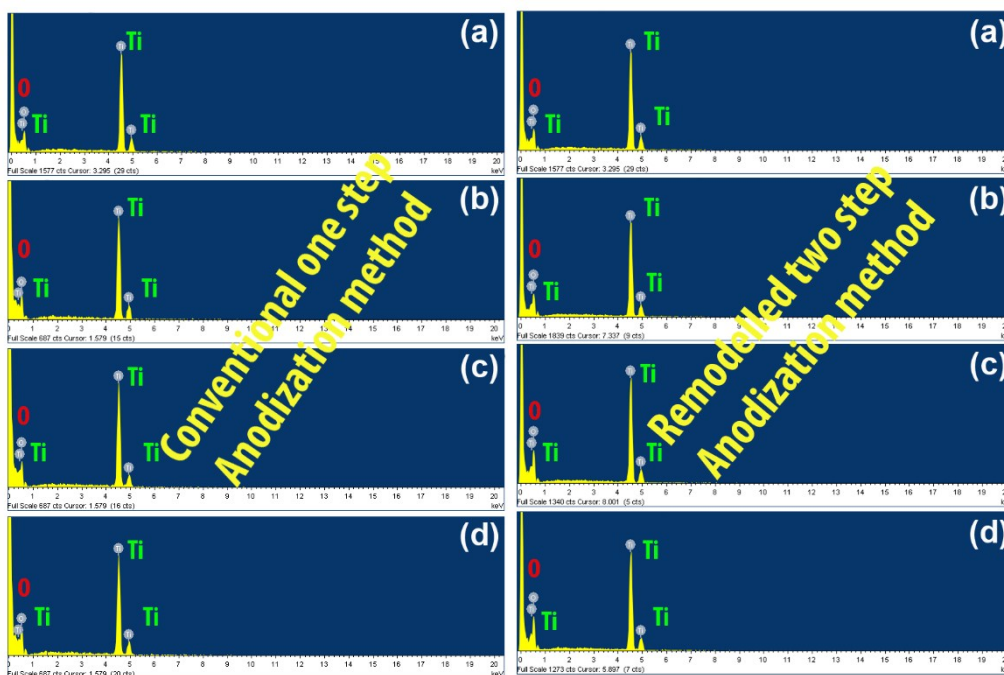

Fig. ES1 EDAX spectra of Titania nanotubes anodized by two different methods at anodizing voltage of (a) 30V (b) 40V (c) 50V and (d) 60V respectively

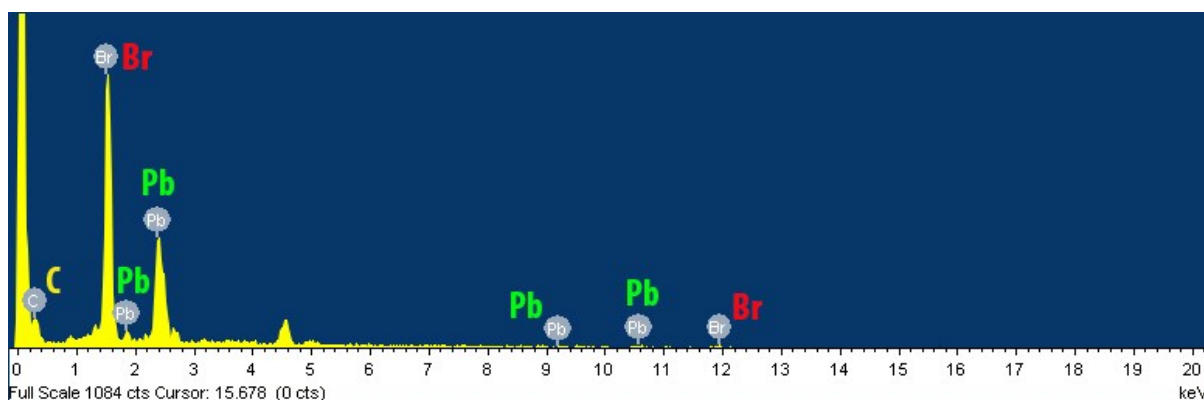

Fig. ES2 EDAX micrograph of  $\text{CH}_3\text{NH}_3\text{PbBr}_3$  perovskite thin film prepared by two-step sequential deposition method

Table ES1 The Average Length and Diameter of TiO<sub>2</sub> samples anodised at various anodising voltages using the conventional one step and remodelled two step method

| Conventional 1 Step Anodization |                                   |             |
|---------------------------------|-----------------------------------|-------------|
| Anodising Voltage               | Dimensions of the grown nanotubes |             |
|                                 | Tube Diameter                     | Tube Length |
| 30V                             | 81nm                              | 1.63µm      |
| 40V                             | 146nm                             | 2.41µm      |
| 50V                             | 160nm                             | 3.07µm      |
| 60V                             | 200nm                             | 7.8µm       |
| Modified 2 Step Anodization     |                                   |             |
| Anodising Voltage               | Dimensions of the grown nanotubes |             |
|                                 | Tube Diameter                     | Tube Length |
| 30V                             | 90nm                              | 1.75µm      |
| 40V                             | 150nm                             | 2.7µm       |
| 50V                             | 173nm                             | 3.55µm      |
| 60V                             | 210nm                             | 9.4µm       |

Table ES2 Photovoltaic performance parameters of Perovskite Solar Cells based on different Titania nanotube length measured under AM 1.5 sunlight illumination

| Anodization Method | Tube Length ( $\mu\text{m}$ ) | $J_{sc}$ ( $\text{mA}/\text{cm}^2$ ) | $V_{oc}$ (mV) | $FF$ | $\eta$ (%) |
|--------------------|-------------------------------|--------------------------------------|---------------|------|------------|
| One Step           | 1.63                          | 2.39                                 | 711           | 0.63 | 1.07       |
|                    | 2.41                          | 4.3                                  | 718           | 0.57 | 1.76       |
|                    | 3.07                          | 6.49                                 | 751           | 0.54 | 2.63       |
|                    | 7.8                           | 7.49                                 | 759           | 0.54 | 3.07       |
| Two Step           | 1.75                          | 3.89                                 | 709           | 0.62 | 1.62       |
|                    | 2.7                           | 5.21                                 | 724           | 0.59 | 2.22       |
|                    | 3.55                          | 6.78                                 | 758           | 0.53 | 2.72       |
|                    | 9.4                           | 8.27                                 | 747           | 0.59 | 3.64       |
